# Supplementary material
Source: Elsevier journal article supplement (https://www.sciencedirect.com/science/article/pii/S0325754120300043)
Supplement: mmc1 [file S0325754120300043:mmc1.pdf]

SUPPLEMENTARY MATERIAL

Figure S1

Evolution of hematological parameters since onset, through hospitalization period and after discharge

Panel a. Leukocytes

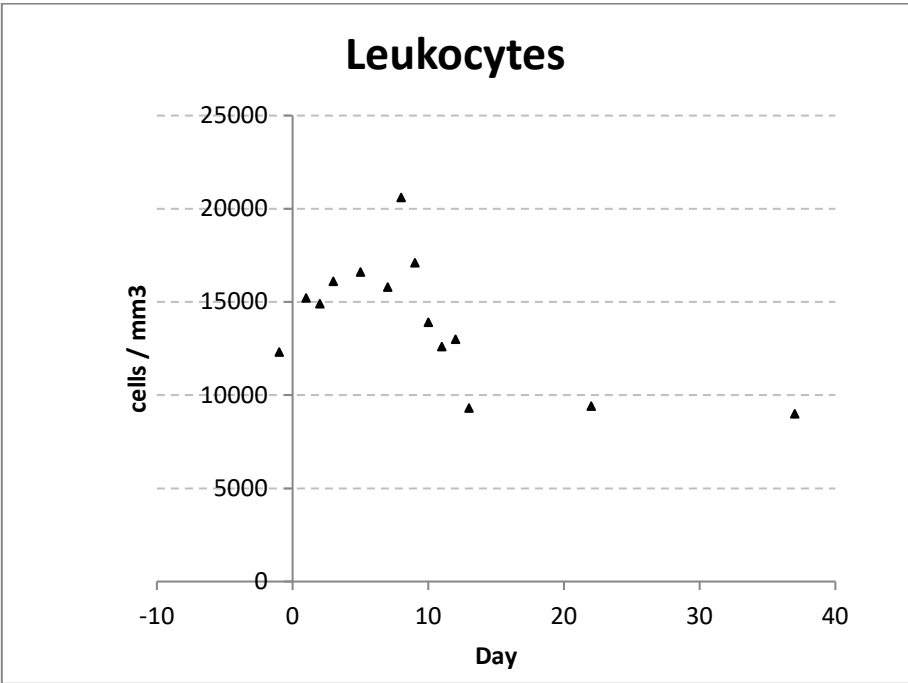

Panel b. Neutrophils

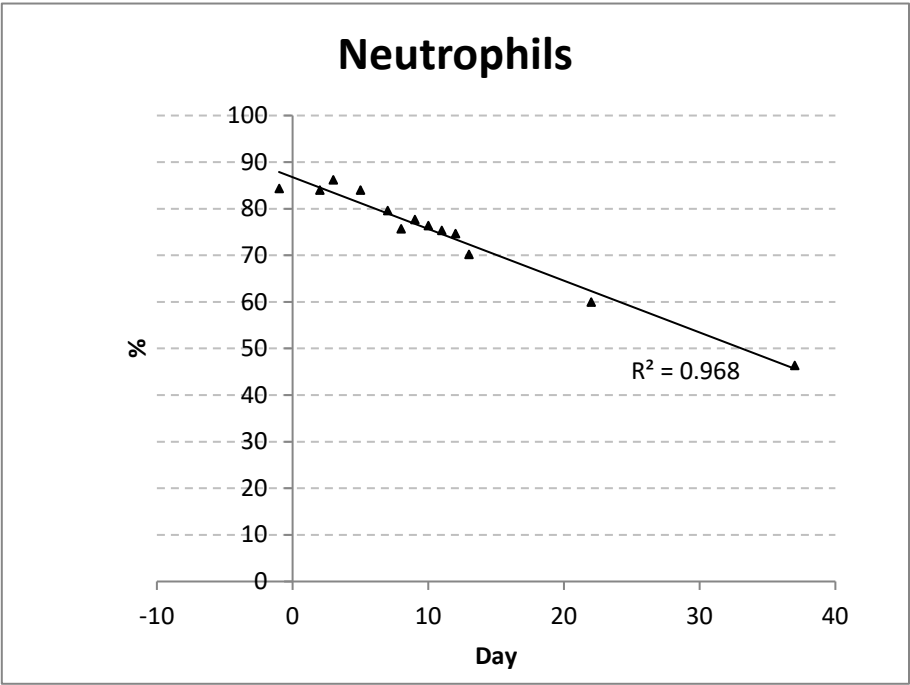

**Panel c. Platelets**

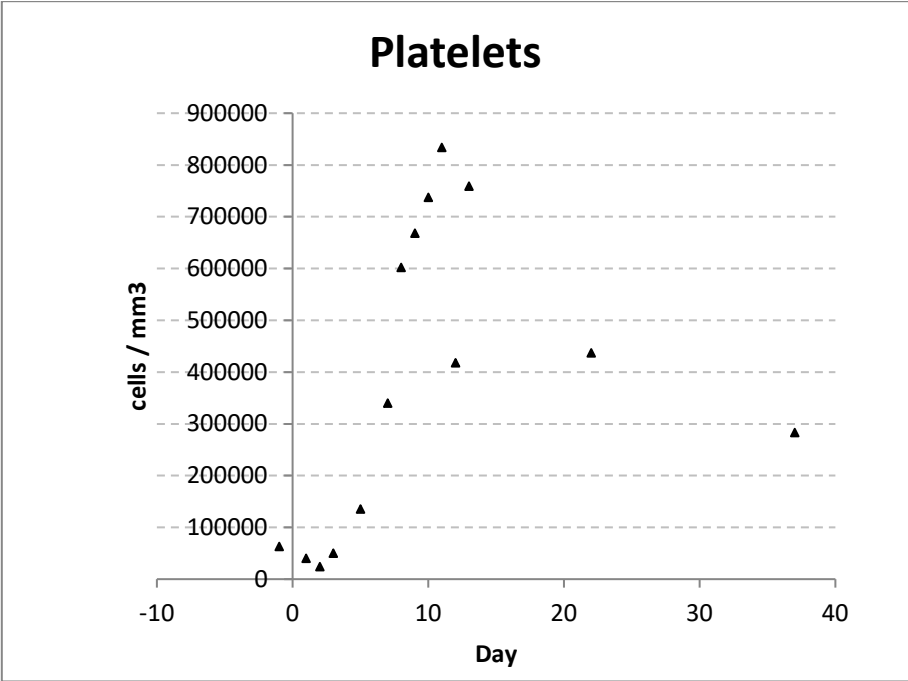

**Panel d. Hematocrit**

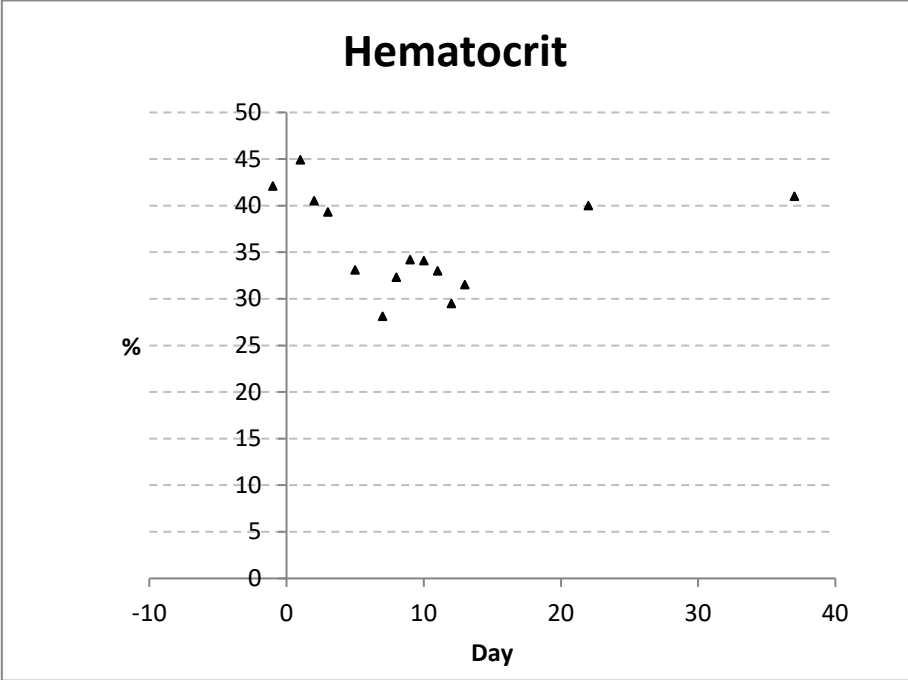

## Figure S2

### Reverse CAMP test

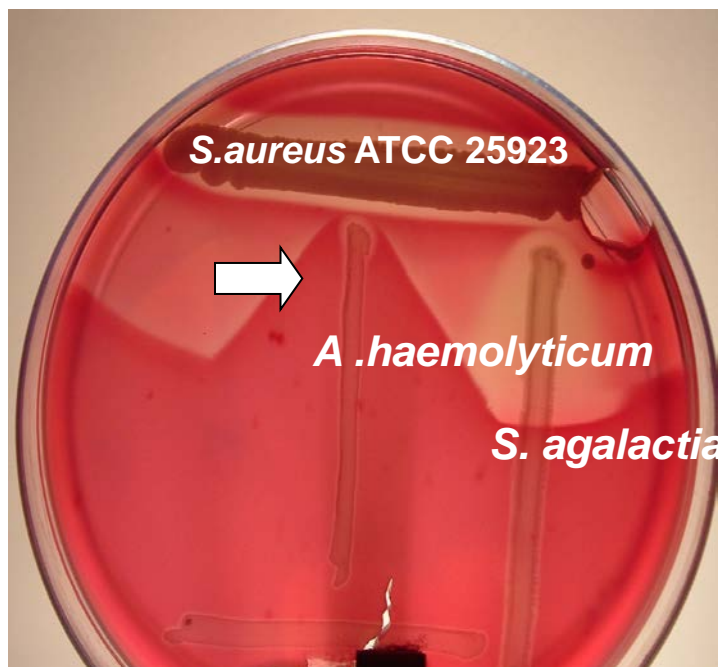

Arrow: narrowing of the hemolytic zone produced by staphylococcal  $\beta$ -lysine.

### Figure S3

**Panel a.** Computer tomography<sup>1</sup> showing two images of small cavitated subpleural abscesses in the right lung (arrow)

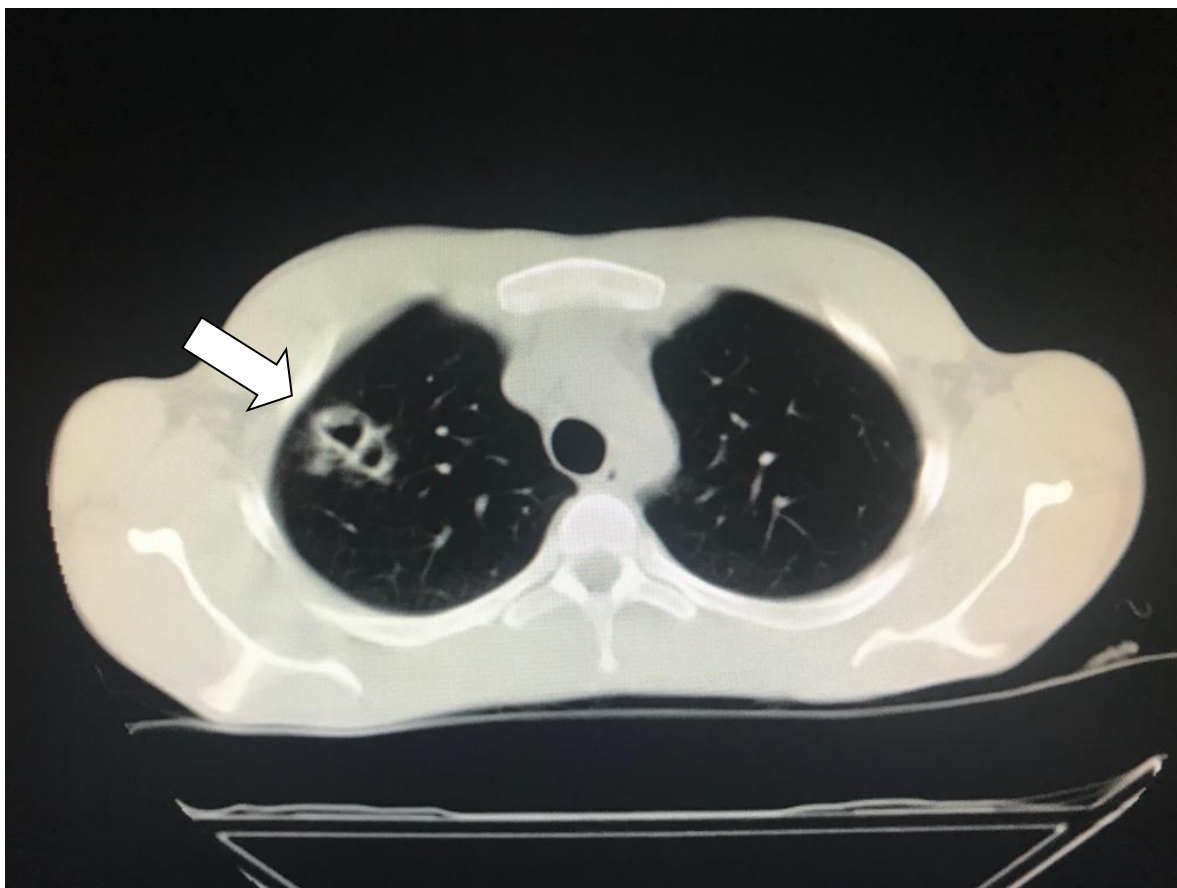

<sup>1</sup>Elscint CT Twin Flash CT Scanner.

**Panel b.** Computer tomography<sup>1</sup> showing an abscessed collection of 10 x 6 cm in the left gluteus medius muscle (arrow) that displaced and compressed surrounding structures

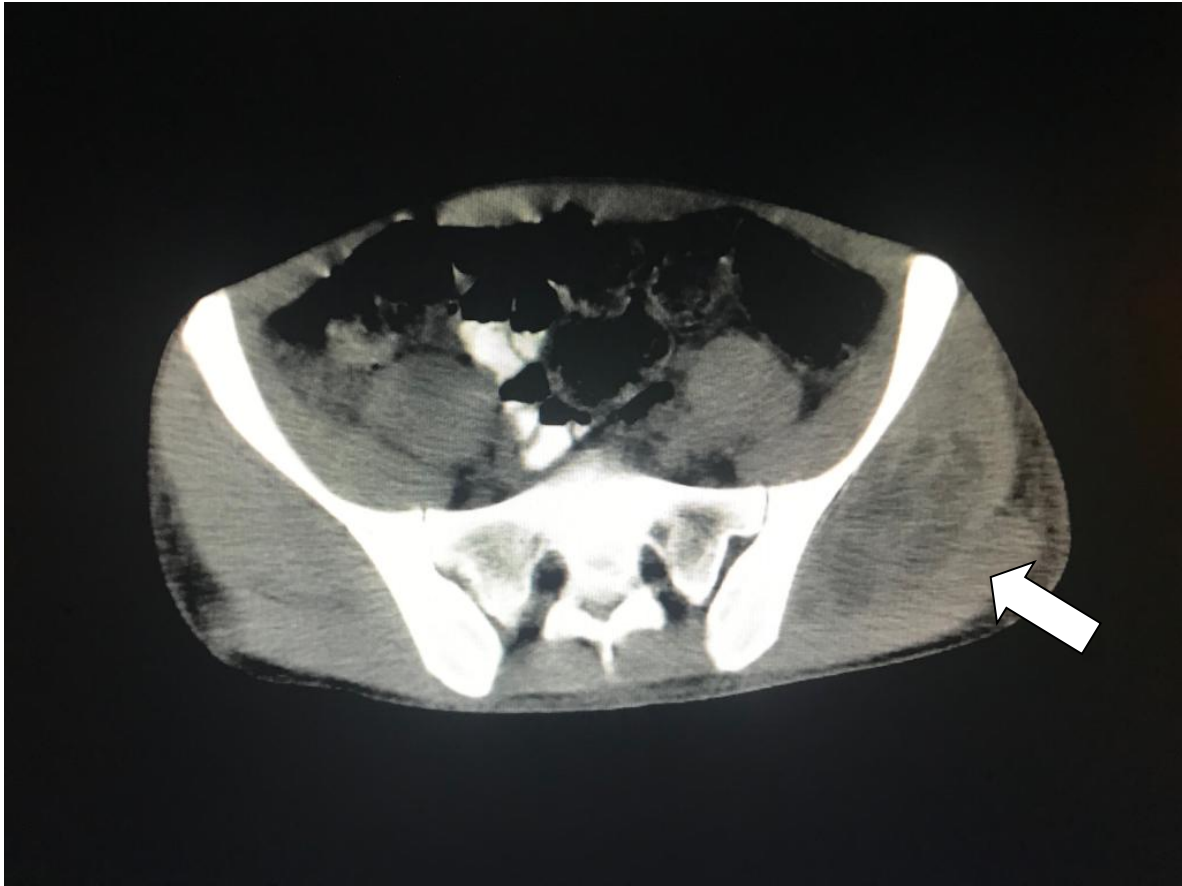

<sup>1</sup>Elscint CT Twin Flash CT Scanner.
